# Supplementary material
Source: PubMed Central journal article supplement (PMC1820728)

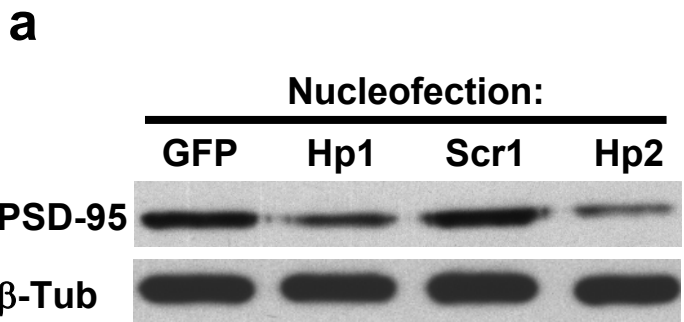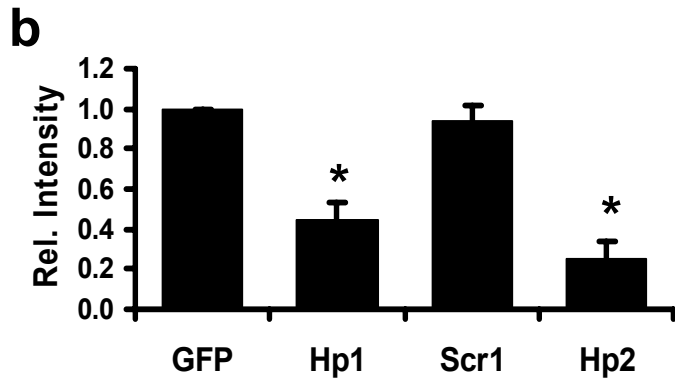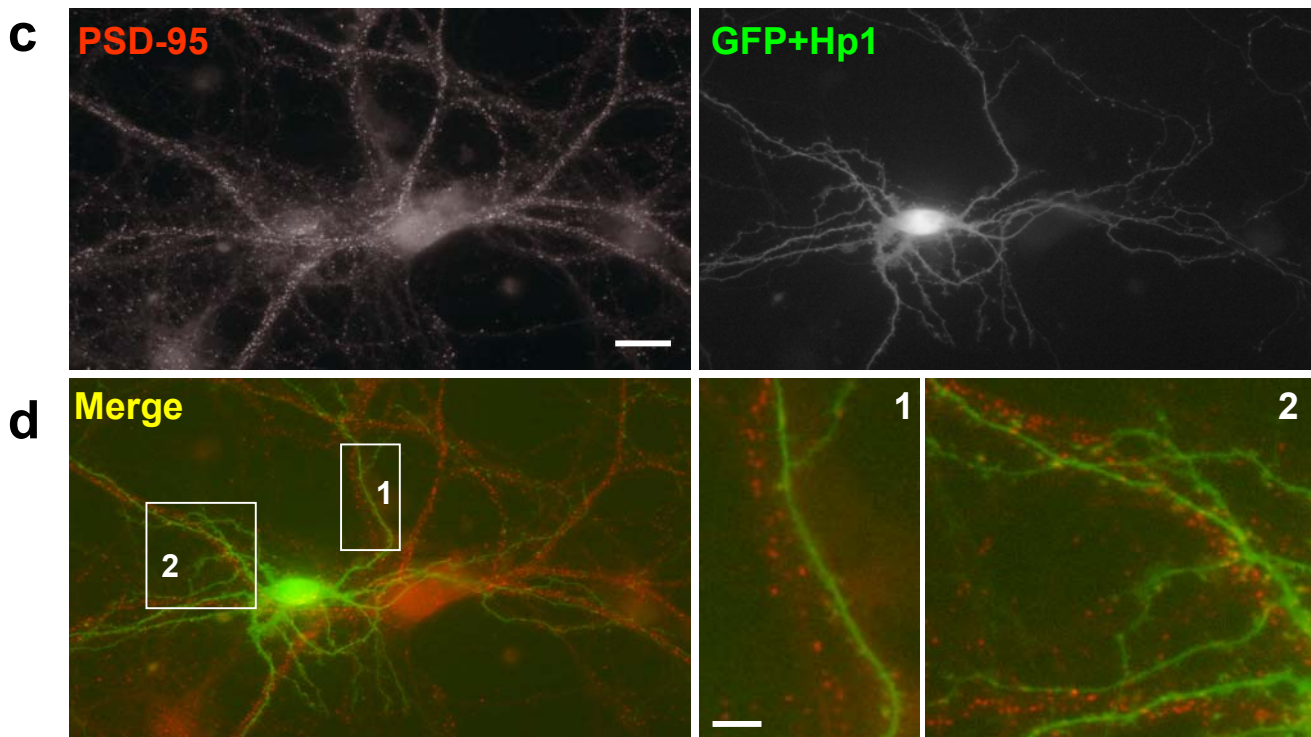

Supplement: pnas_0609307104_1.pdf [file pnas_0609307104_1.pdf]

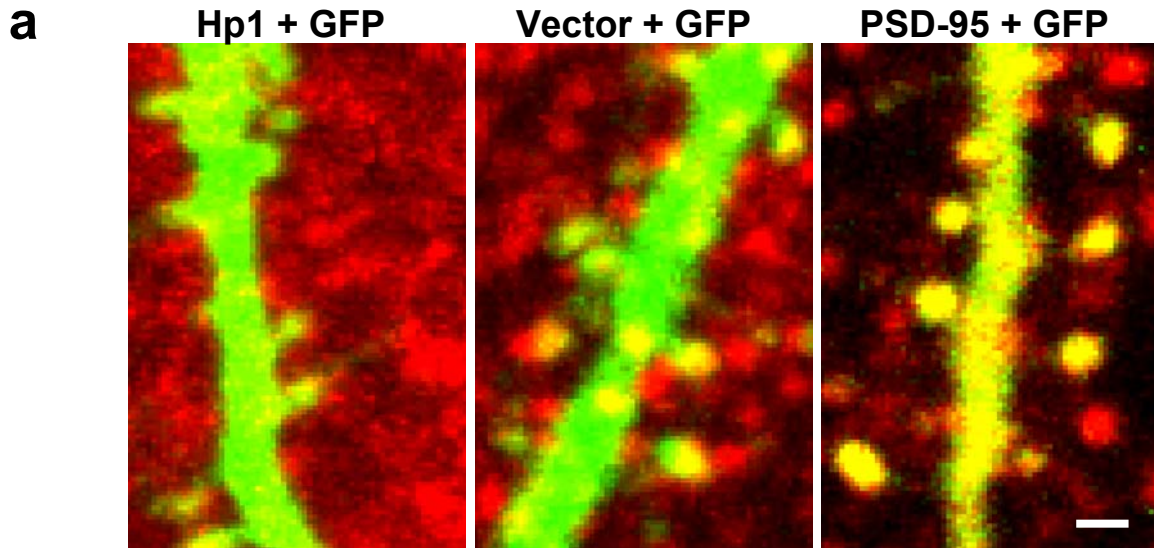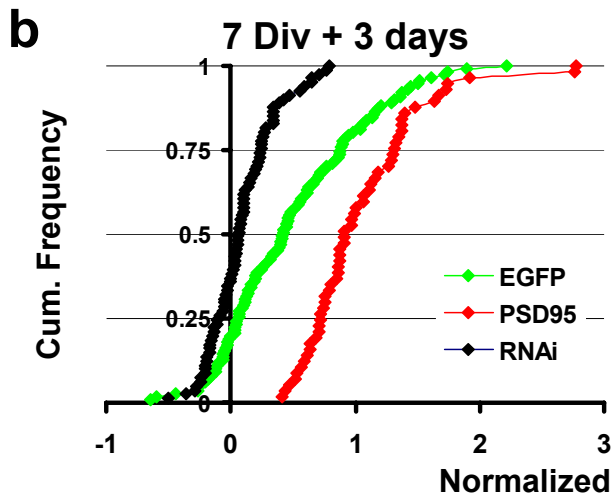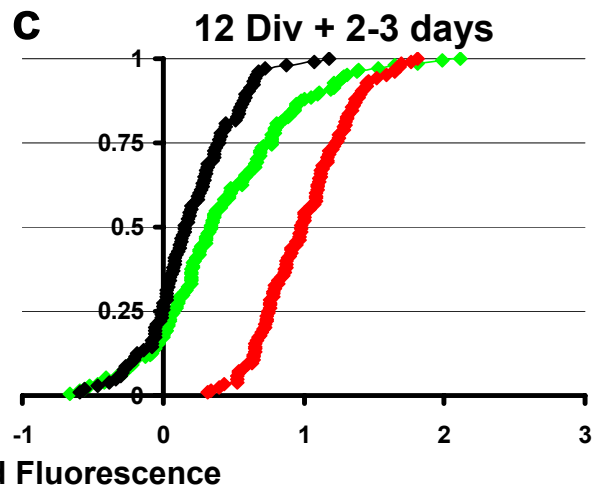

Supplement: pnas_0609307104_2.pdf [file pnas_0609307104_2.pdf]

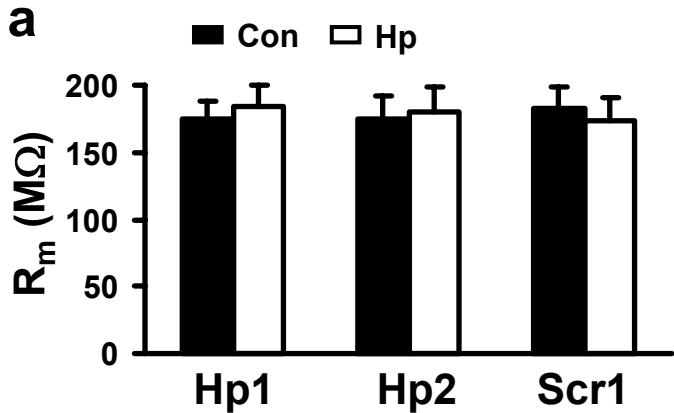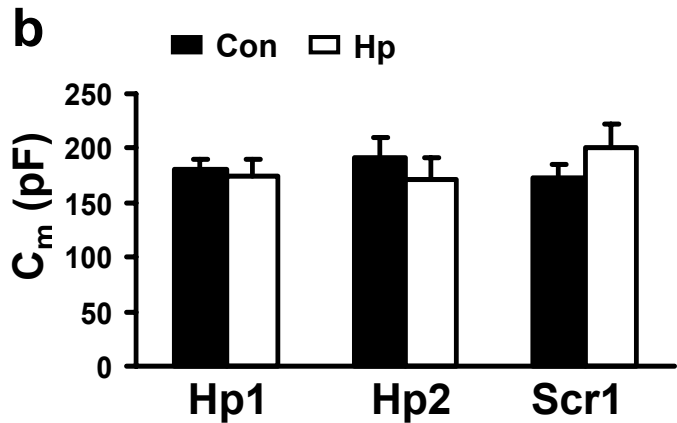

Supplement: pnas_0609307104_3.pdf [file pnas_0609307104_3.pdf]

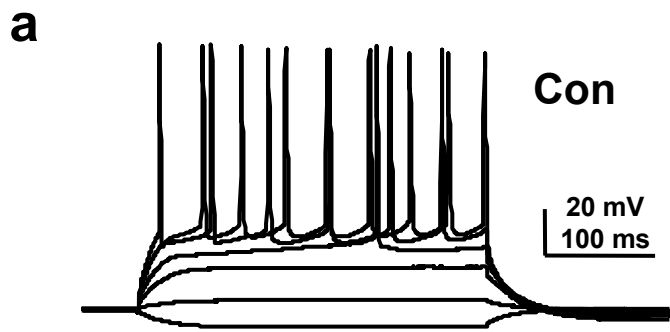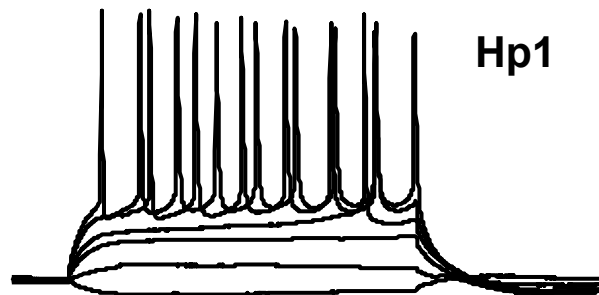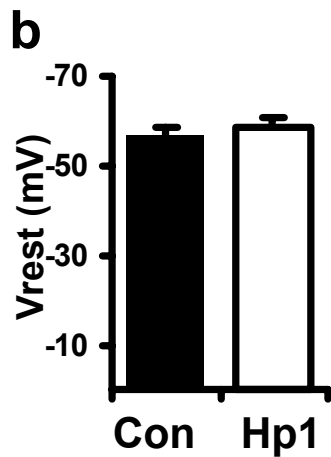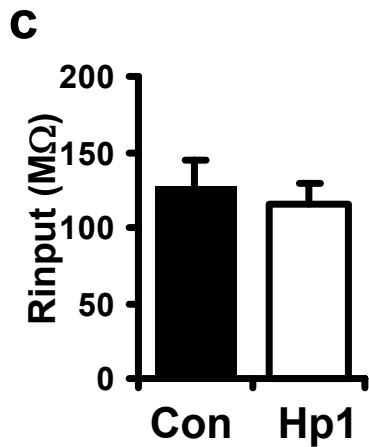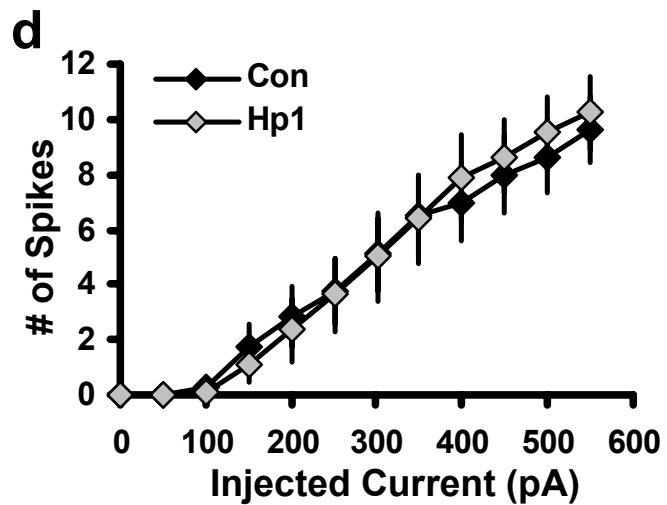

Supplement: pnas_0609307104_4.pdf [file pnas_0609307104_4.pdf]

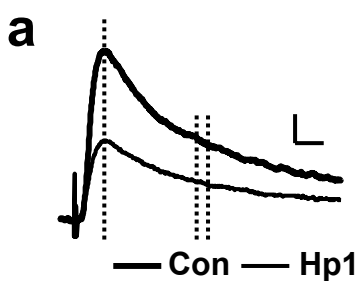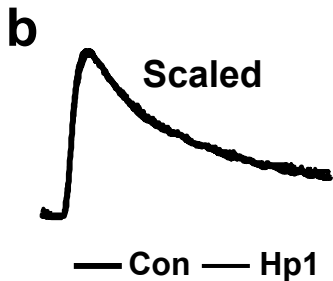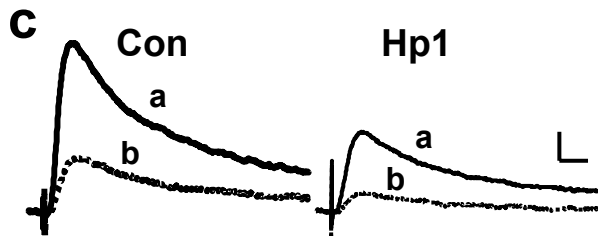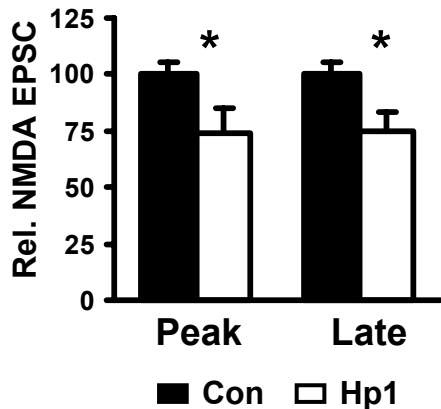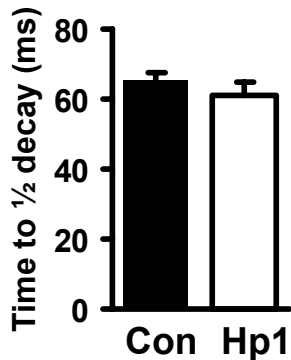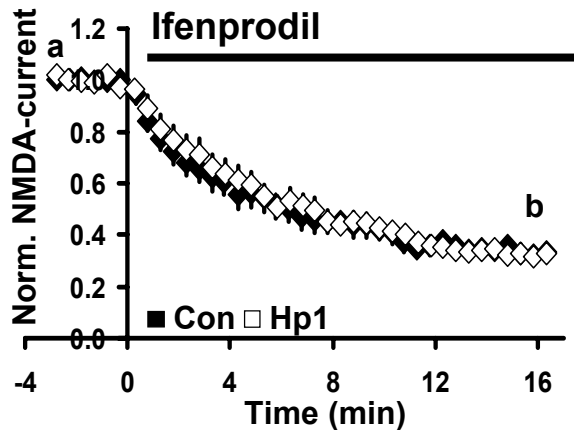

Supplement: pnas_0609307104_5.pdf [file pnas_0609307104_5.pdf]

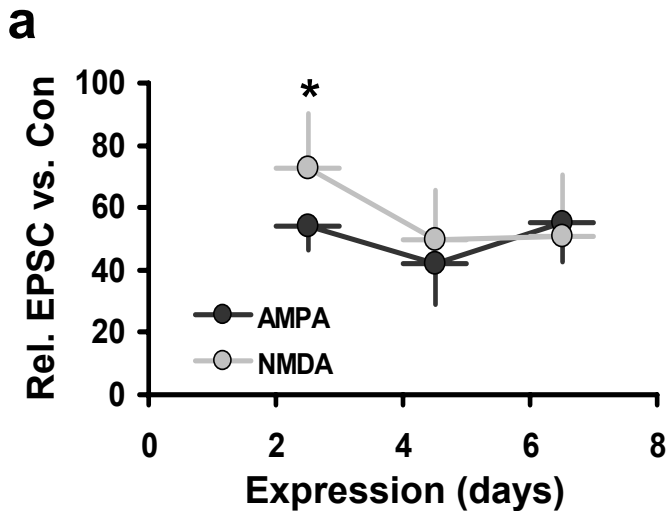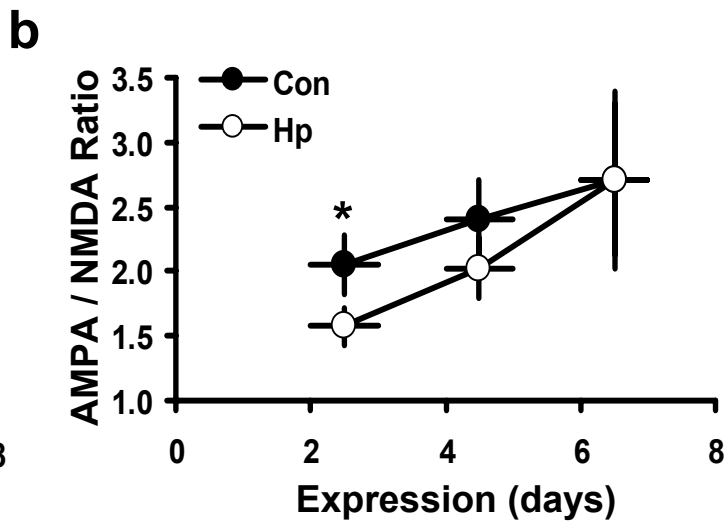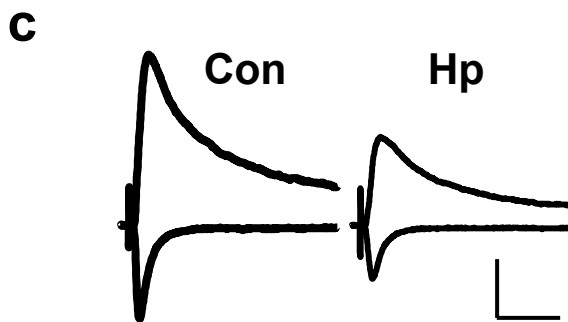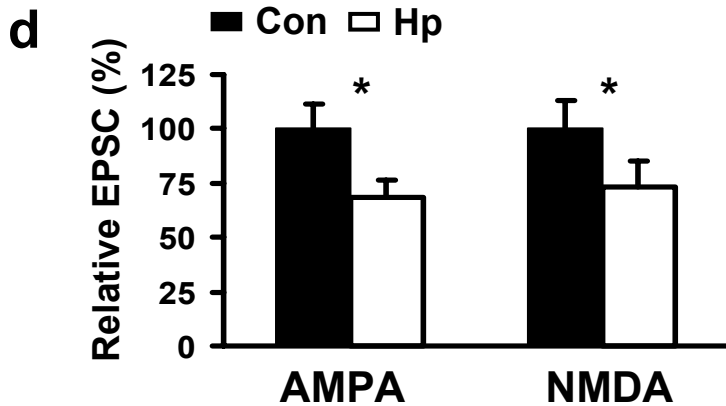

Supplement: pnas_0609307104_6.pdf [file pnas_0609307104_6.pdf]
